# Supplementary material
Source: Springer Nature journal article supplement (https://www.springermedizin.de/resource/supplementary/12887_2013_872_MOESM2_ESM.pdf/9475964)
Supplement: MOESM2 [file 9475964]

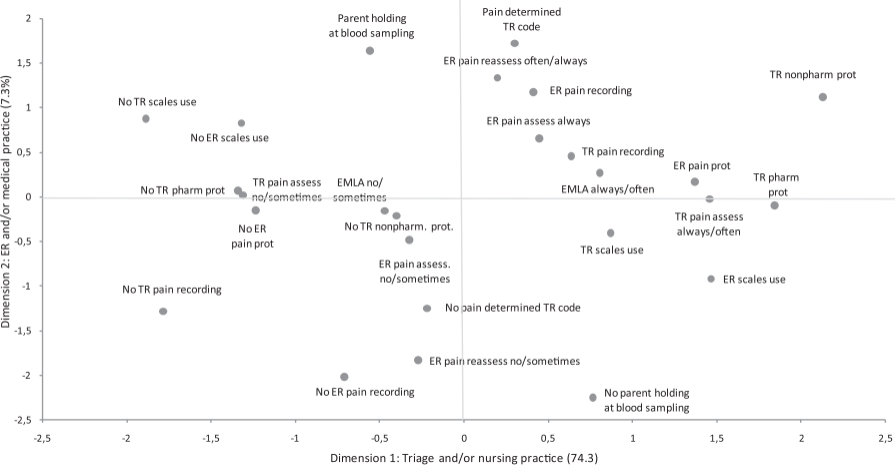

Abbreviations: TR (triage), ER (emergency room), prot (protocol), pharm (pharmacological), assess (assessment)
